# Supplementary material for: A “Pincer” Type of Acridine–Triazole Fluorescent Dye for Iodine Detection by Both ‘Naked-Eye’ Colorimetric and Fluorometric Modes
Source: MDPI journal article supplement (doi:10.3390/molecules29061355), 2024-03-19
Supplement: s1 [file s1]

Article

# A “Pincer” Type of Acridine–Triazole Fluorescent Dye for Iodine Detection by Both ‘Naked-Eye’ Colorimetric and Fluorometric Modes

Mei Yu <sup>1,2</sup>, Lu Jiang <sup>1,2</sup>, Lan Mou <sup>1,2</sup>, Xi Zeng <sup>1,2</sup>, Ruixiao Wang <sup>1</sup>, Tao Peng <sup>1</sup>, Fuyong Wu <sup>1,\*</sup> and Tianzhu Shi <sup>1,\*</sup>

<sup>1</sup> Department of Brewing Engineering, Moutai Institute, Renhuai 564500, China; yumei@mtxy.edu.cn (M.Y.); jianglu@mtxy.edu.cn (L.J.); moulan@mtxy.edu.cn (L.M.); zengxi@mtxy.edu.cn (X.Z.); wangruixiao@mtxy.edu.cn (R.W.); edifcztony@126.com (T.P.)

<sup>2</sup> Key Laboratory of Macrocyclic and Supramolecular Chemistry of Guizhou Province, Guiyang 550025, China

\* Correspondence: wufuyong@mtxy.edu.cn (F.W.); shitianzhu@mtxy.edu.cn (T.S.); Tel.: +86-13423675949 (F.W.); +86-18586420308 (T.S.)

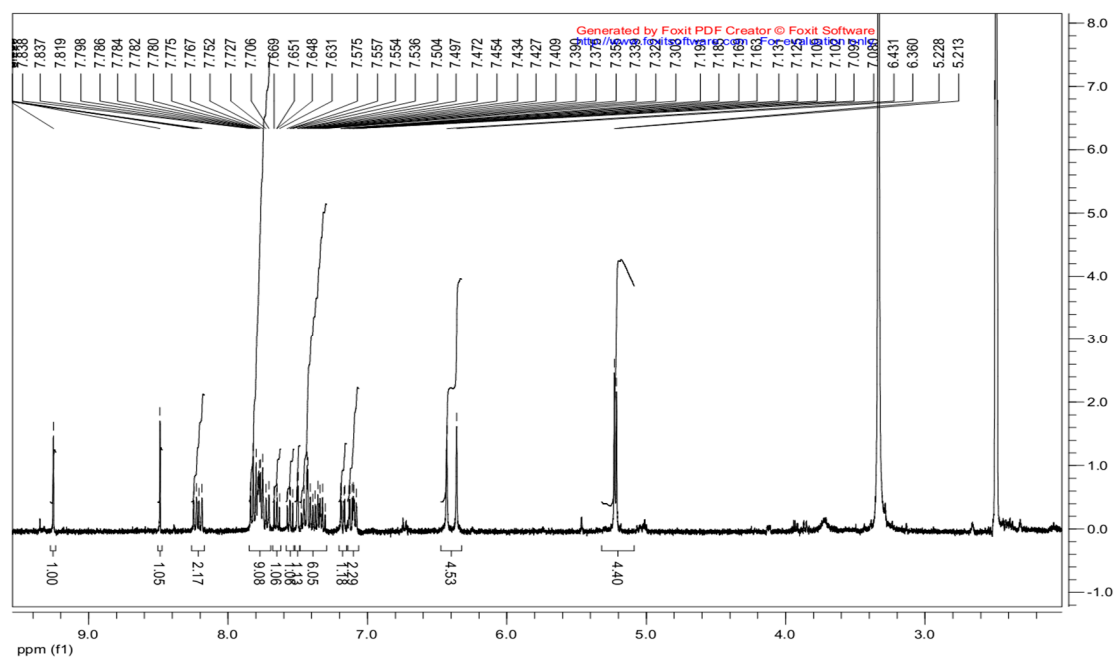

Figure S1 The  $^1\text{H}$  NMR spectrum of Probe 1

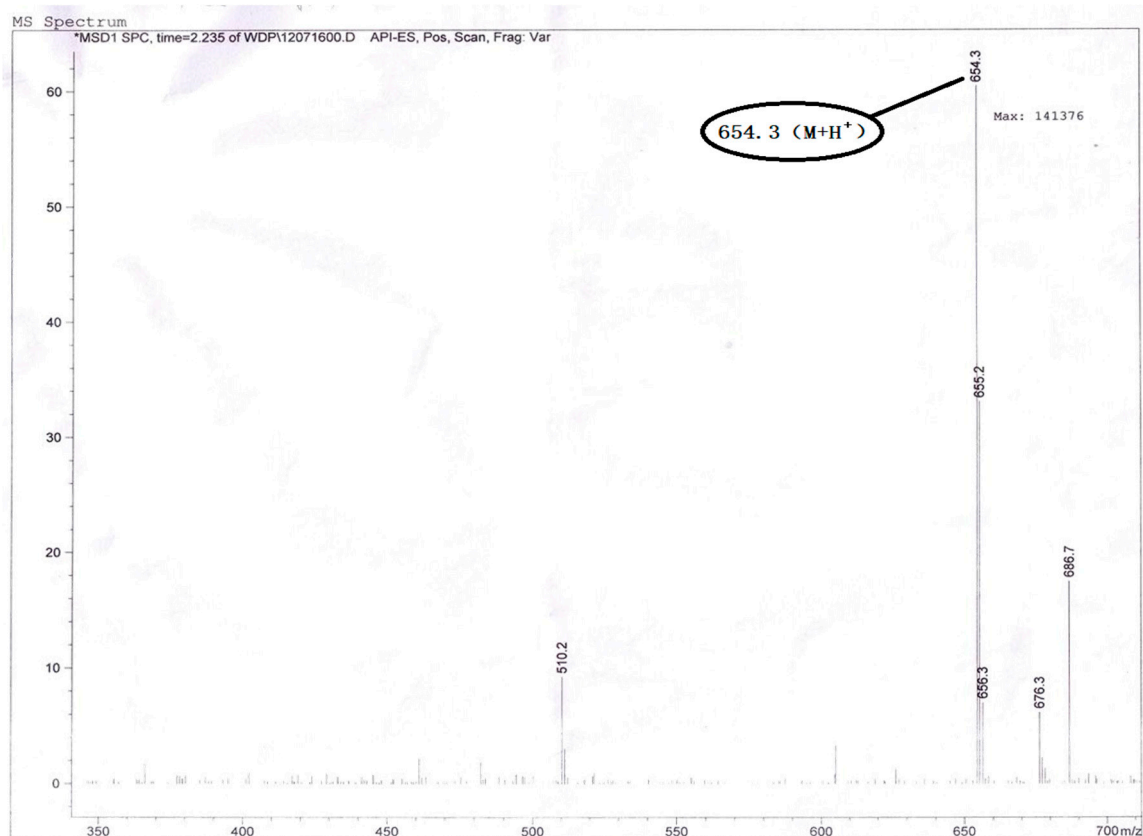

Figure S2 ESI-MS of Probe 1

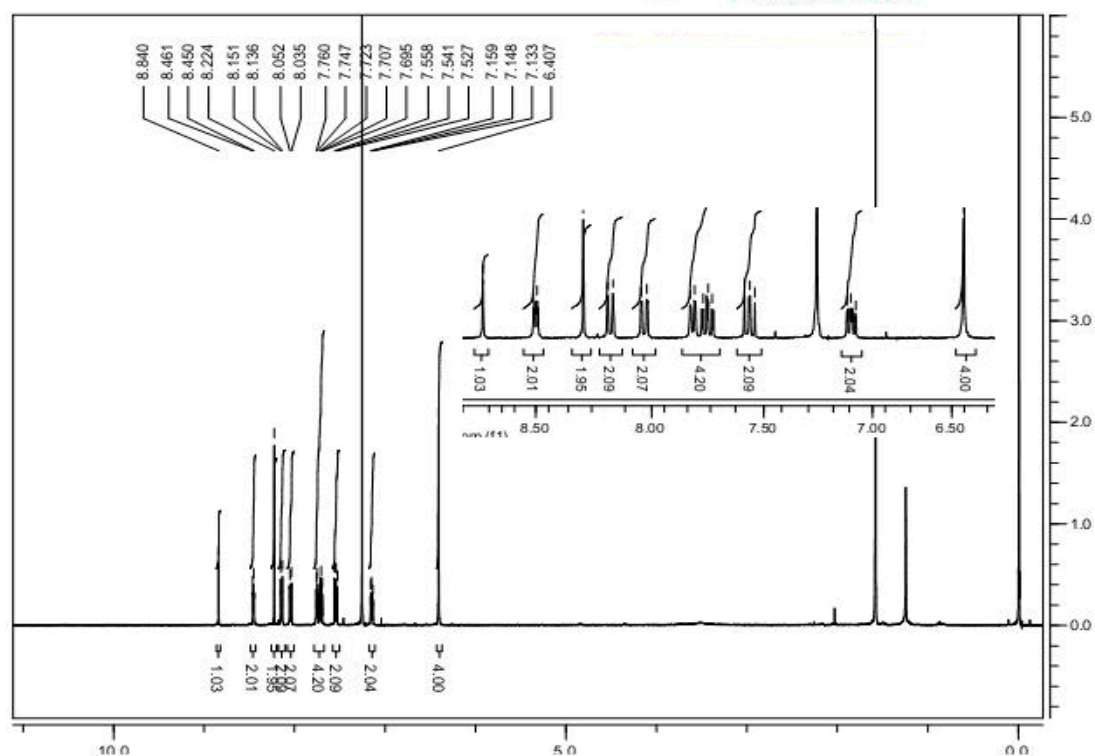

Figure S3 The  $^1\text{H}$  NMR spectrum of Probe 2

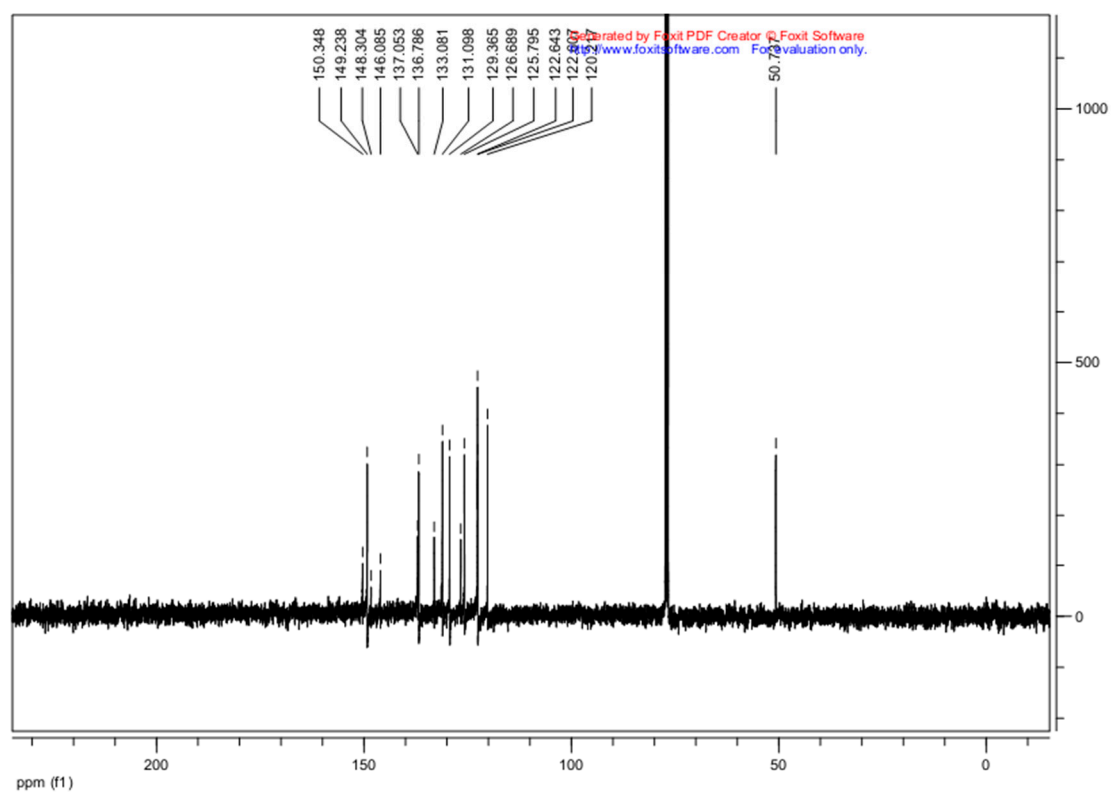

Figure S4 The  $^{13}\text{C}$  NMR spectrum of Probe 2

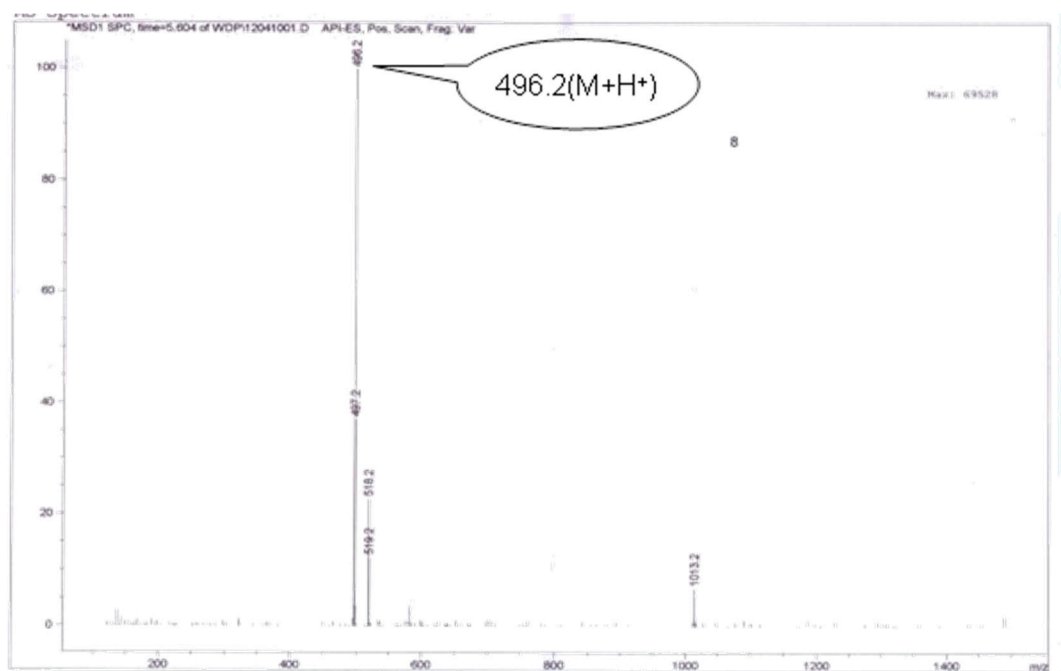

Figure S5 ESI-MS of Probe 2

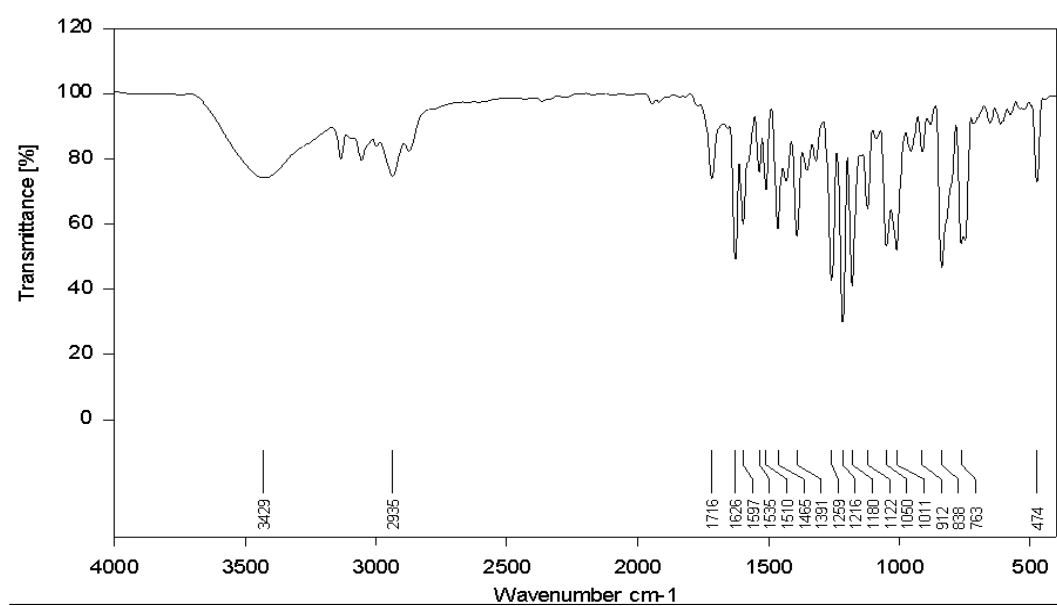

Figure S6 IR of Probe 1

Probe 2

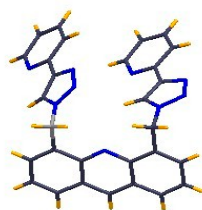

|                                     |                                                                                     |
|-------------------------------------|-------------------------------------------------------------------------------------|
| CCDC number                         | 903268                                                                              |
| Empirical formula                   | C <sub>29</sub> H <sub>21</sub> N <sub>9</sub>                                      |
| Formula weight                      | 495.55                                                                              |
| Temperture, K                       | 293(2)                                                                              |
| Crystal system                      | Triclinic                                                                           |
| Space group                         | P-1                                                                                 |
| a (Å)                               | 9.9302(10)                                                                          |
| b (Å)                               | 10.1923(8)                                                                          |
| c (Å)                               | 13.3068(10)                                                                         |
| α, °                                | 77.319(3)                                                                           |
| β, °                                | 79.609(3)                                                                           |
| γ, °                                | 64.984(3)                                                                           |
| V, Å <sup>3</sup>                   | 1184.84(18)                                                                         |
| ρ, g cm <sup>-3</sup>               | 1.389                                                                               |
| Z                                   | 2                                                                                   |
| R(int)                              | 0.0513                                                                              |
| R(sigma)                            | 0.0601                                                                              |
| μ, mm <sup>-1</sup>                 | 0.088                                                                               |
| S                                   | 1.058                                                                               |
| Data integrity                      | 0.974                                                                               |
| θ range, (°)                        | 1.58 ≤ θ ≤ 26.00                                                                    |
| F(000)                              | 516                                                                                 |
| Reflection collection               | 13396                                                                               |
| Independent reflection              | 4551                                                                                |
| R, wR [ <i>I</i> > 2σ ( <i>I</i> )] | 0.0606, 0.1671                                                                      |
| R, wR (all data)                    | 0.1043, 0.2101                                                                      |
| Final R indexes                     | $w=1/[\sigma^2 (F_o^2)+(0.151$<br>$2P)^2+0.0000P]$<br>$P = [ F_o^2 + 2 F_c^2 ] / 3$ |

Figure S7 crystal data of Probe 2

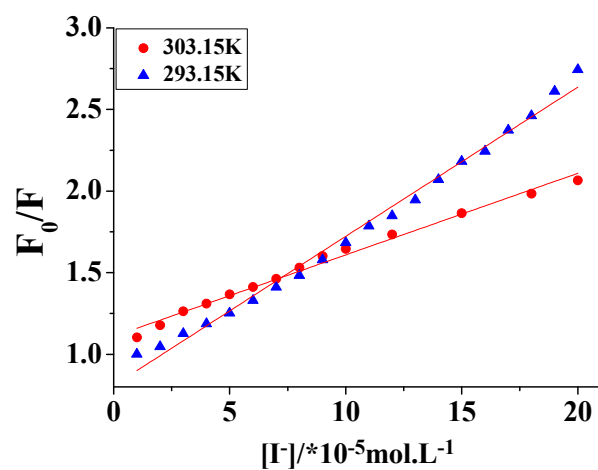

Figure S8 Stern-Volmer plot for probe in the presence of iodide.

$$Y=0.8090+0.0914X(293.15\text{K})$$

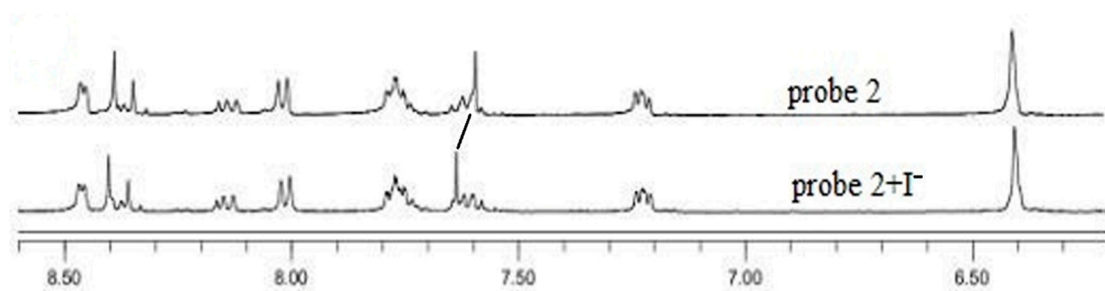

Figure S9 The changes of partial  $^1\text{H}$  NMR of probe 2 upon with  $\text{I}^-$
